# Supplementary material
Source: Springer Nature journal article supplement (https://www.springermedizin.de/resource/supplementary/12985_2010_920_MOESM4_ESM.pdf/9608746)

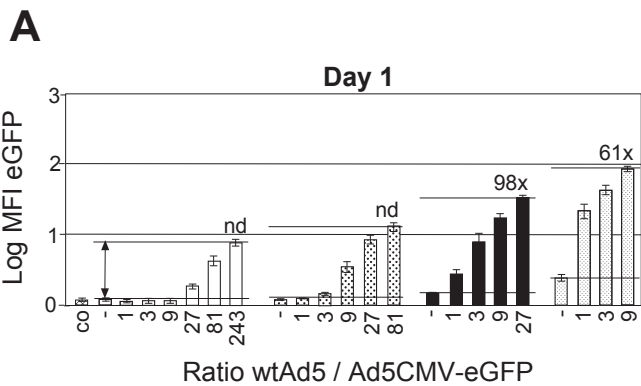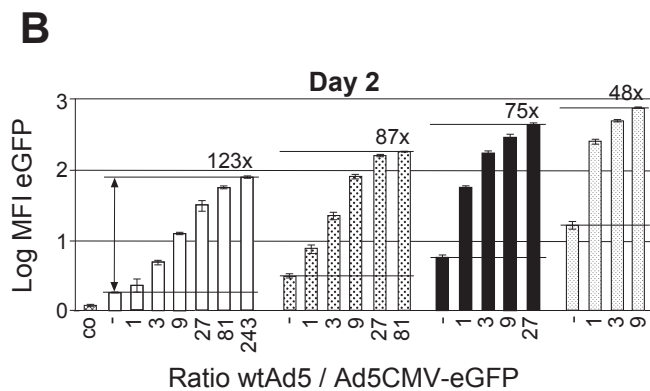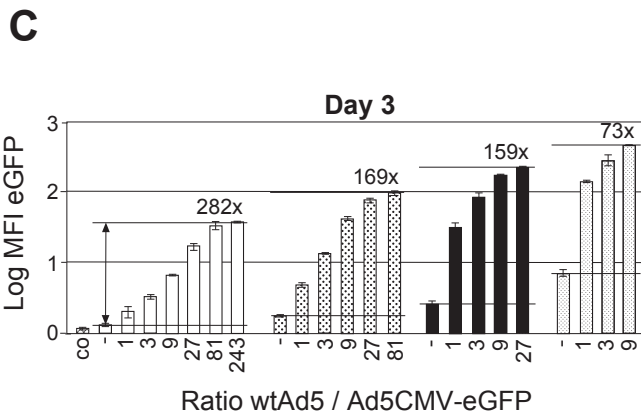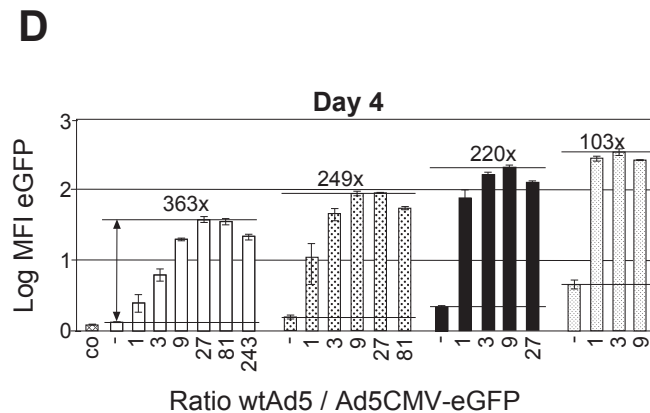

MOI AdCMV-eGFP

□ 0.37 ▨ 1.1 ■ 3.3 ▩ 10

Supplement: MOESM4 [file 9608746]
